# Supplementary material
Source: publisher figshare collection journal article supplement (https://tandf.figshare.com/ndownloader/files/22897124)
Supplement: Supplementary file 1 [file 22897124]

Synthesis of highly functionalized selenophenes via a three-component condensation
Zahra Siroosa, Alireza Hassanabadib* , Mohammad H. Mosslemina

aDepartment of Chemistry, Yazd Branch, Islamic Azad University, Yazd, Iran

bDepartment of Chemistry, Zahedan Branch, Islamic Azad University, Zahedan, Iran

E-mail: ar_hasanabadi@yahoo.com


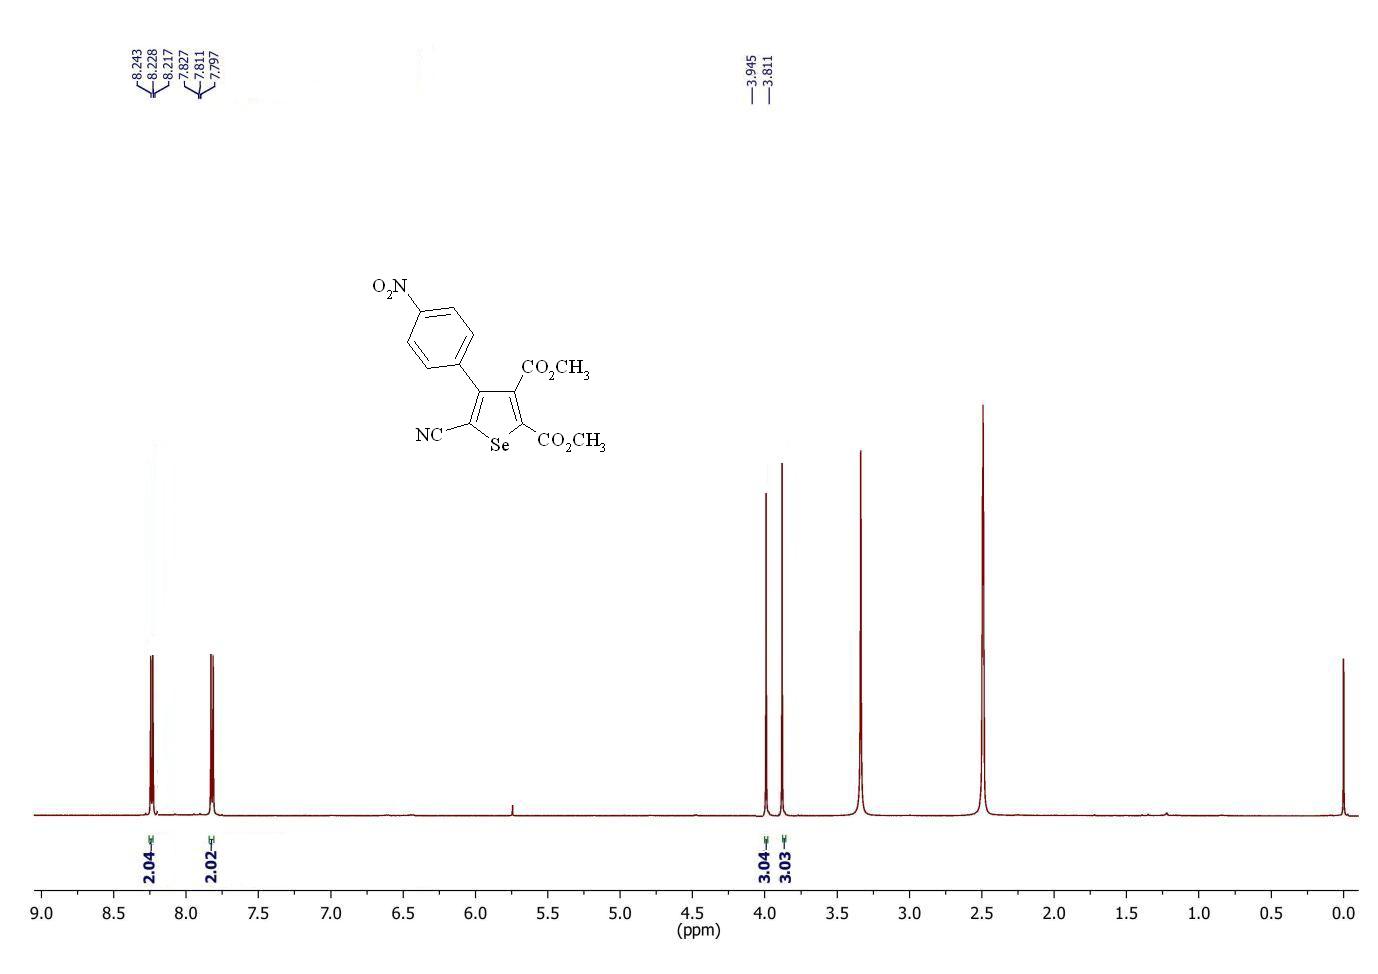


**Figure S 1:** 1H NMR spectrum of **3a**

**
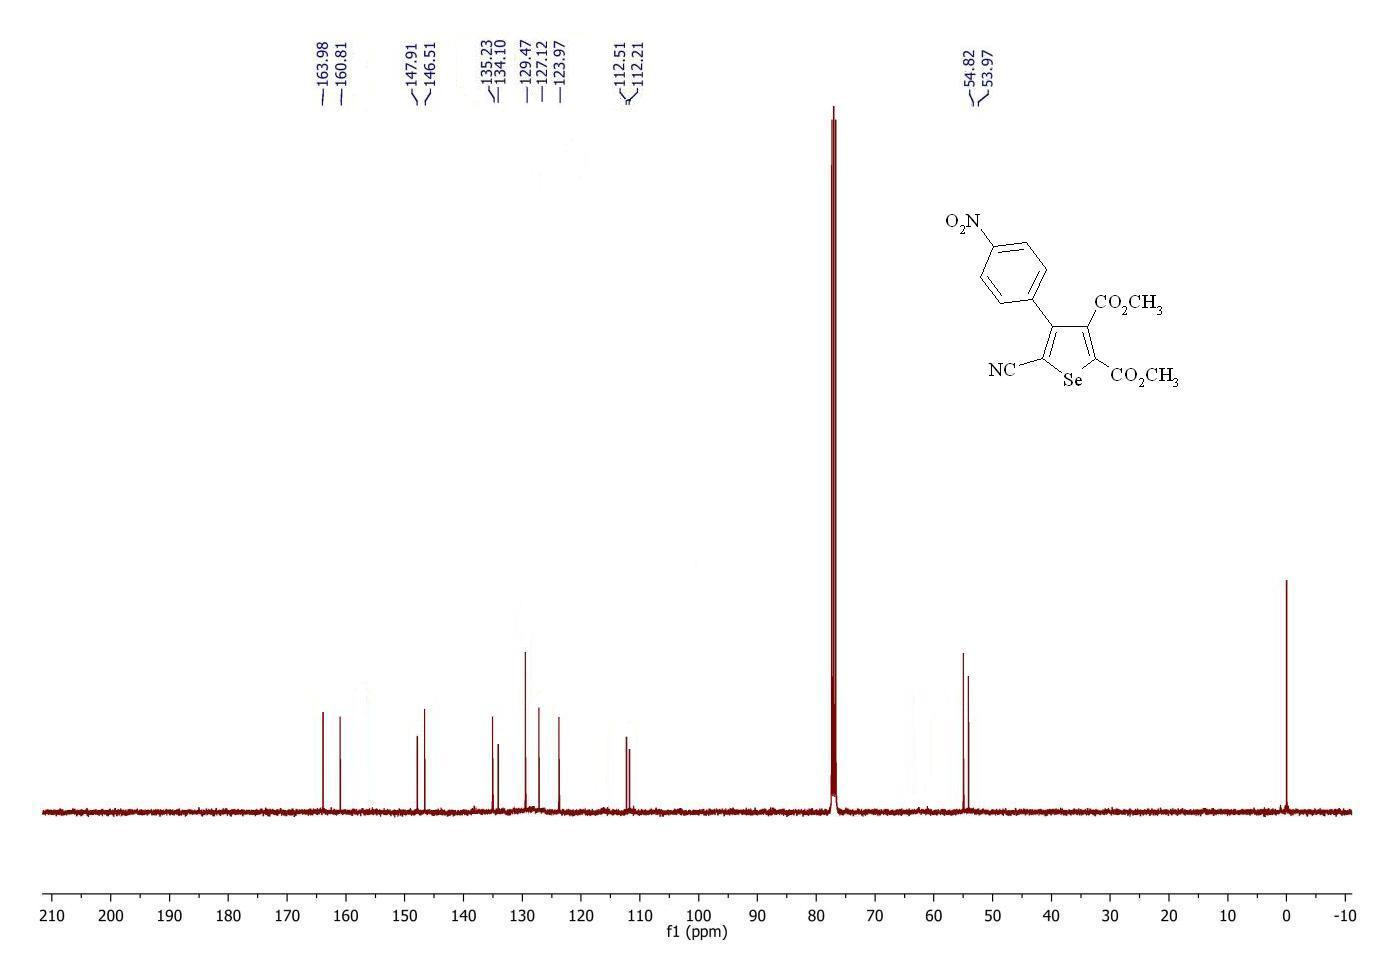
**

**Figure S 2:** 13C NMR spectrum of **3a**


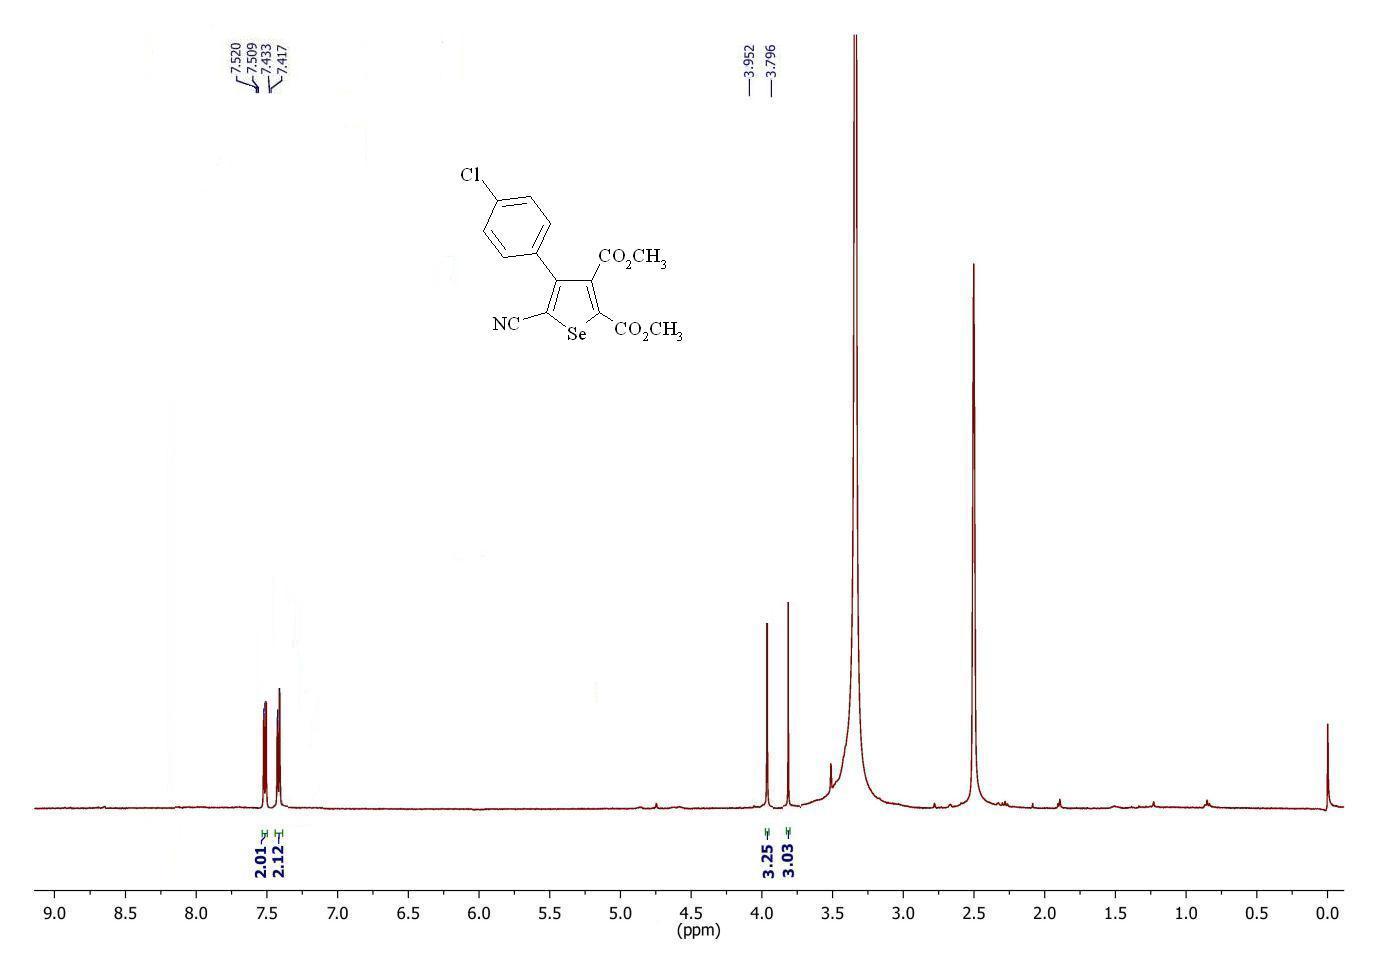


**Figure S 3:** 1H NMR spectrum of **3b**


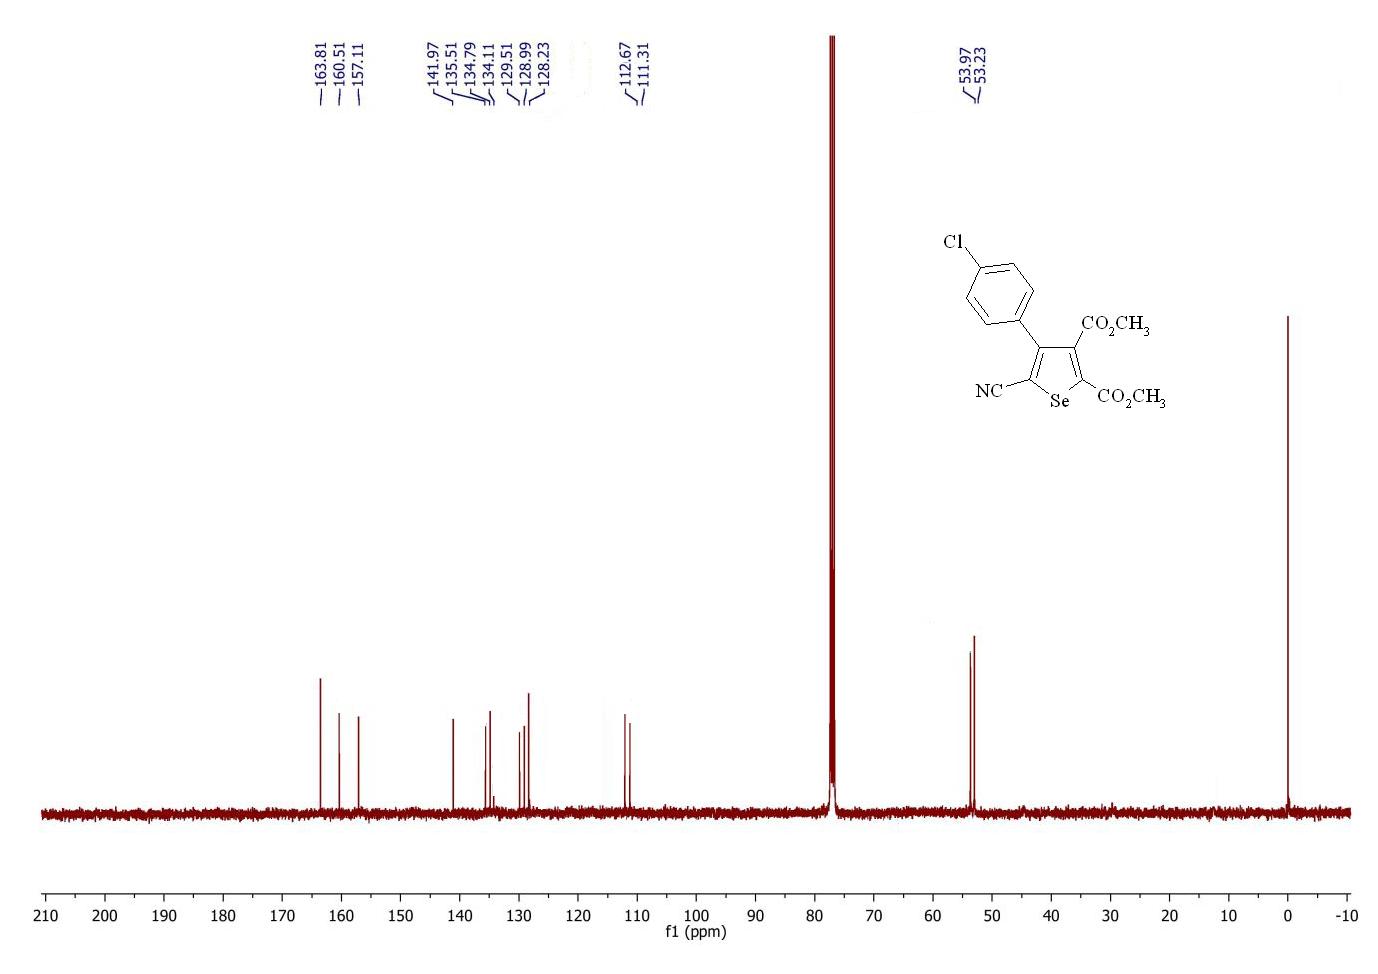


**Figure S 4:** 13C NMRspectrum of **3b**


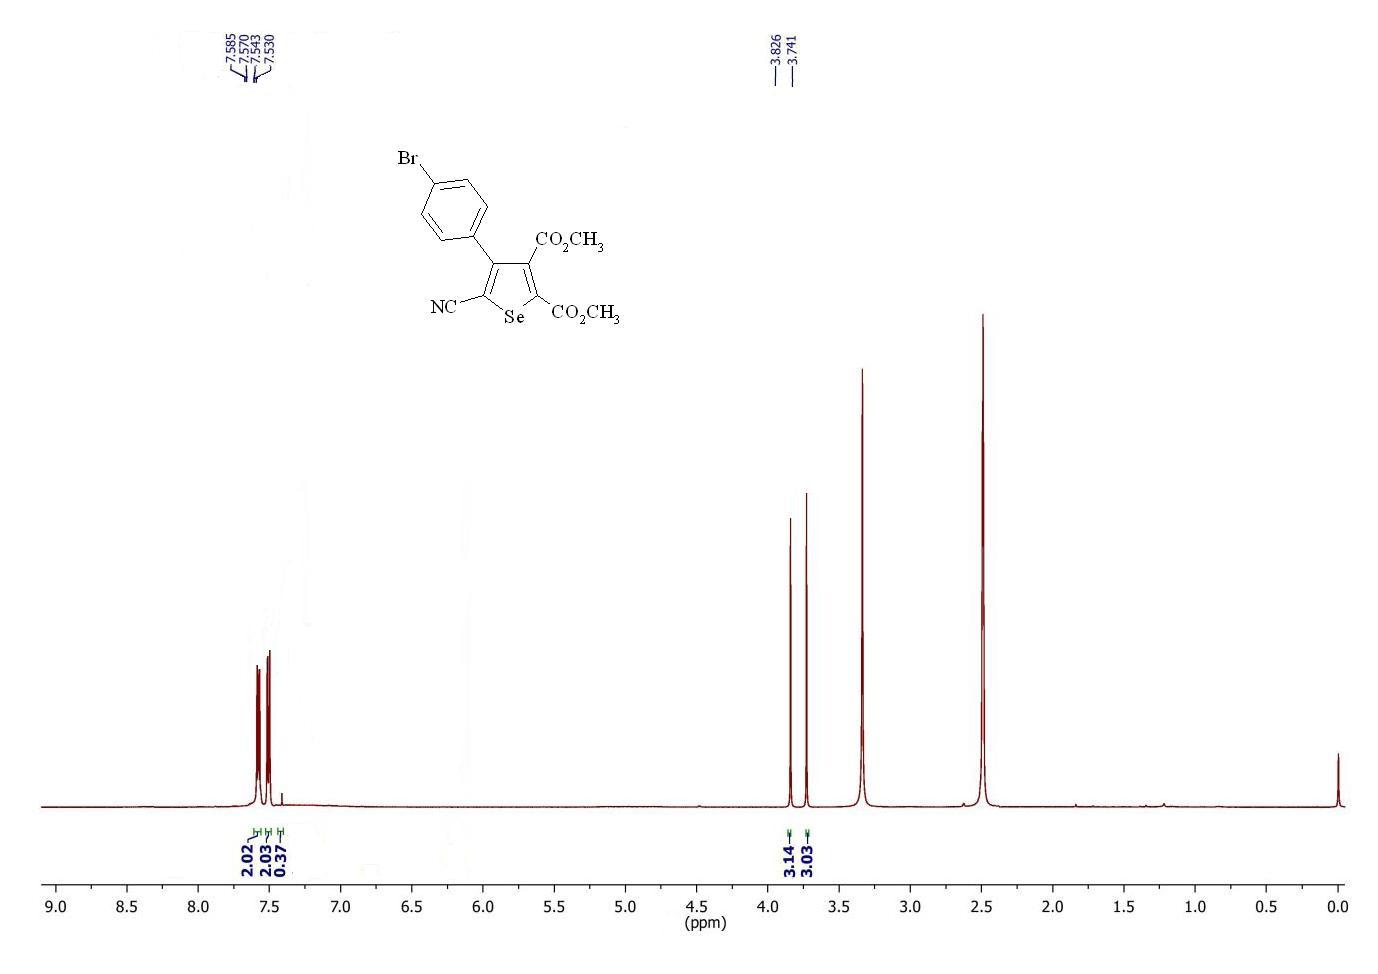


**Figure S 5:** 1H NMR spectrum of **3c**


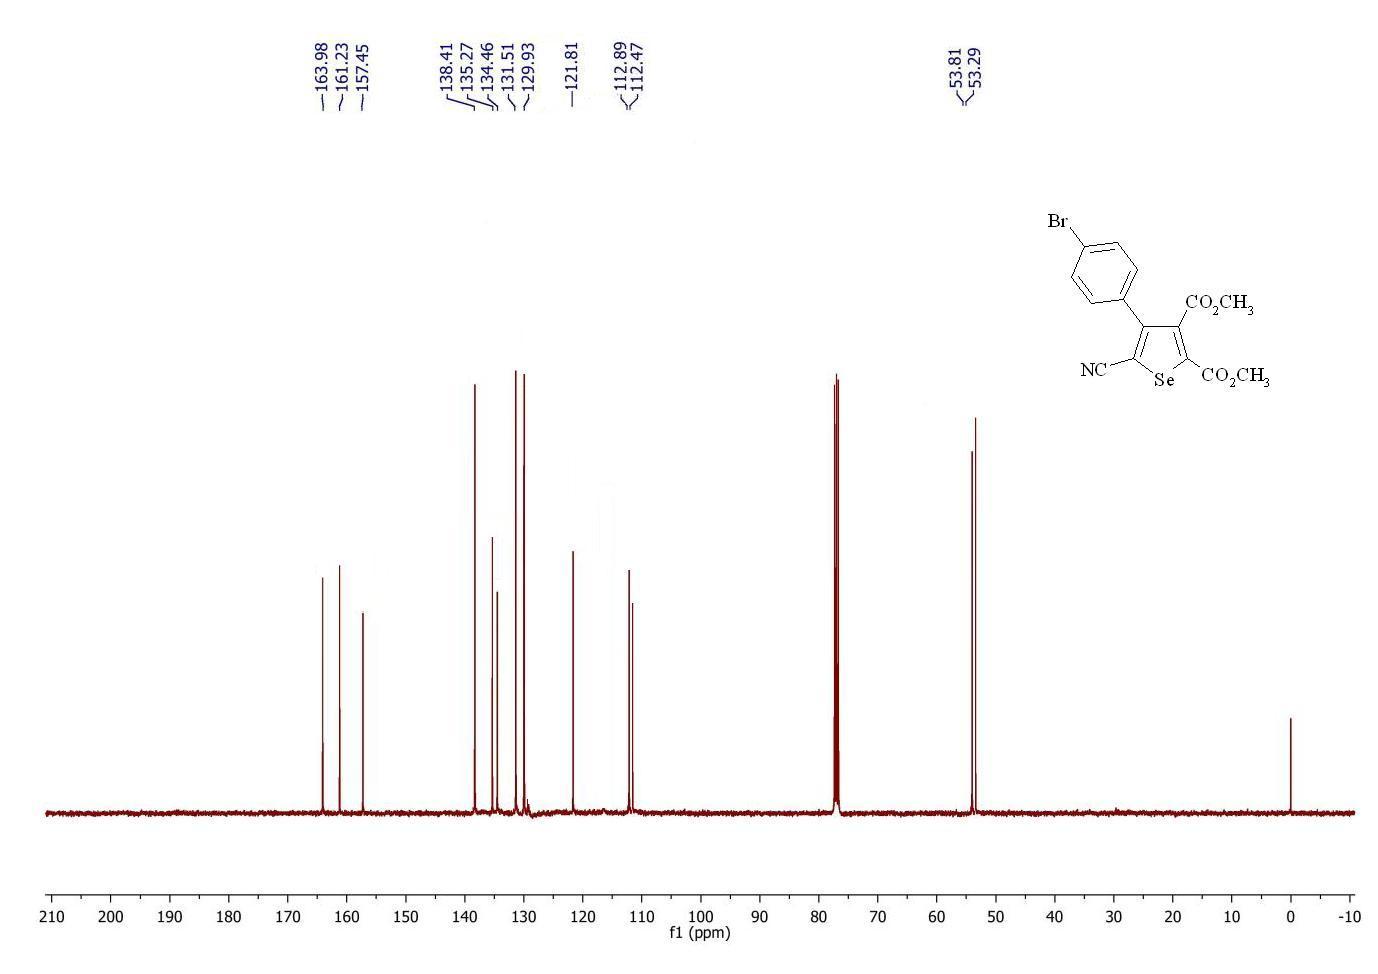


**Figure S 6:** 13C NMRspectrum of **3c**


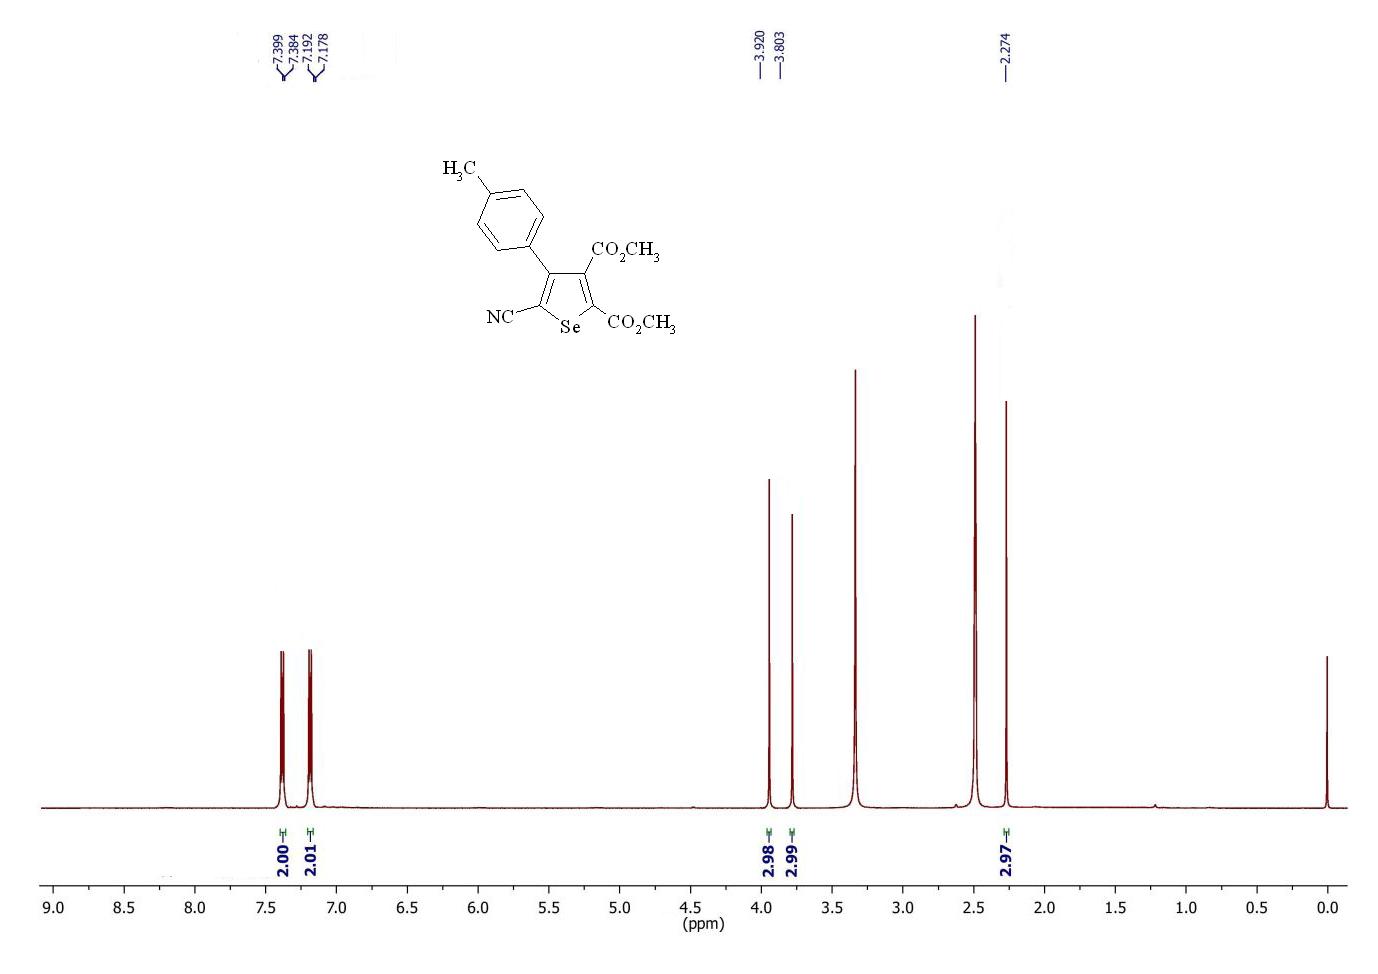


**Figure S 7:** 1H NMR spectrum of **3d**


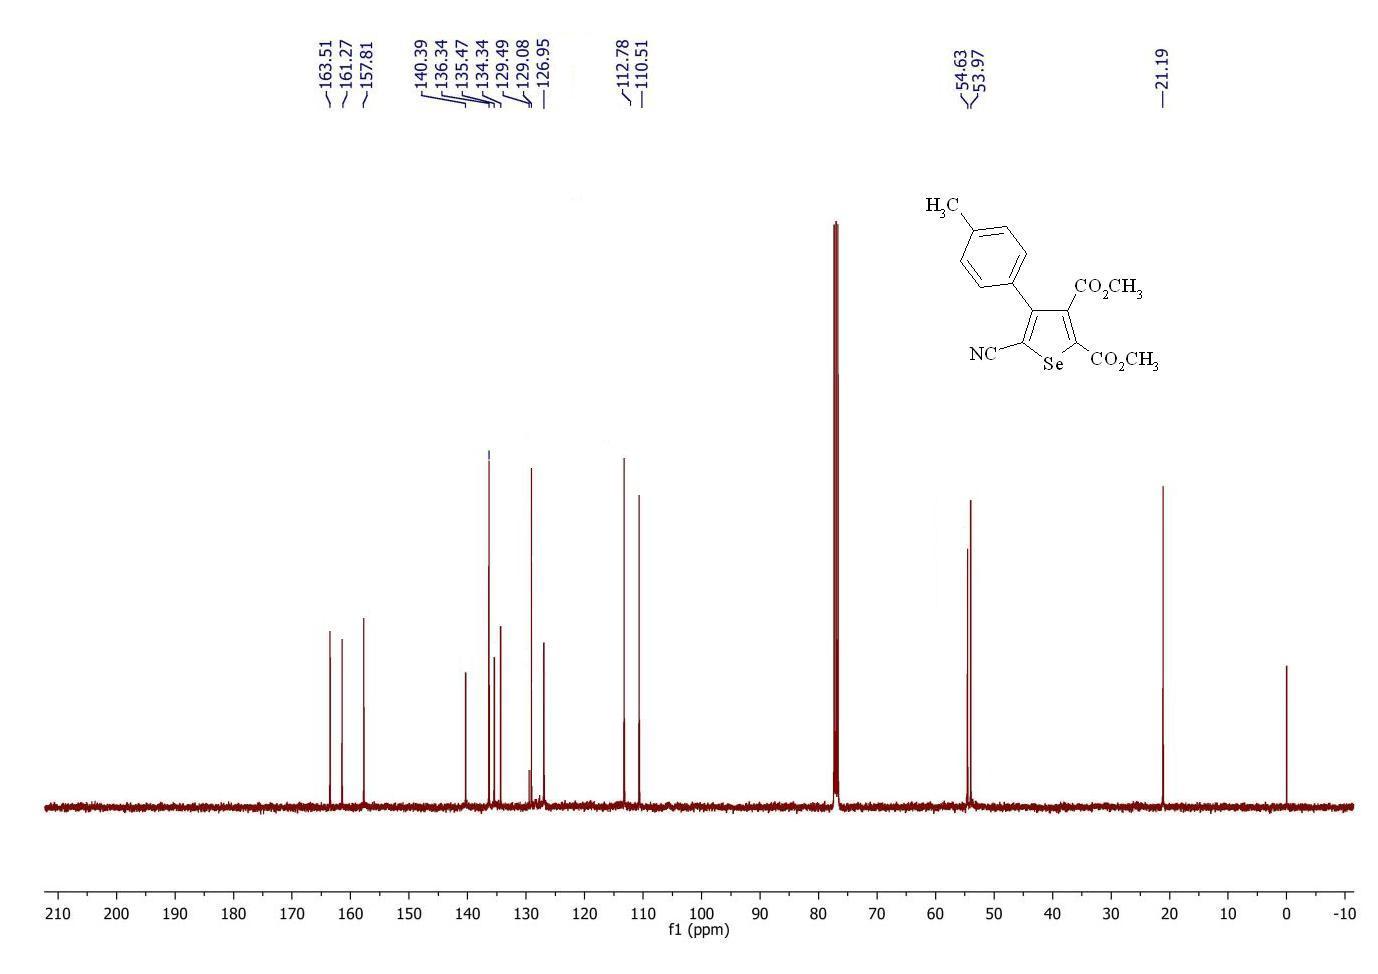


**Figure S 8:** 13C NMRspectrum of **3d**


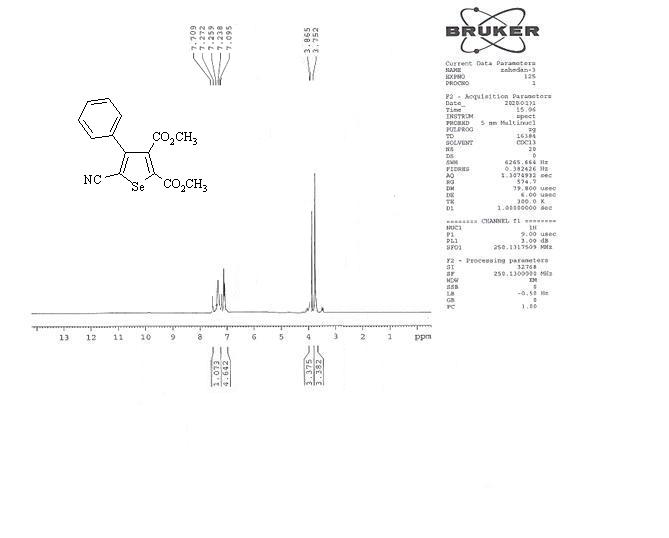


**Figure S 9:** 1H NMR spectrum of **3e**


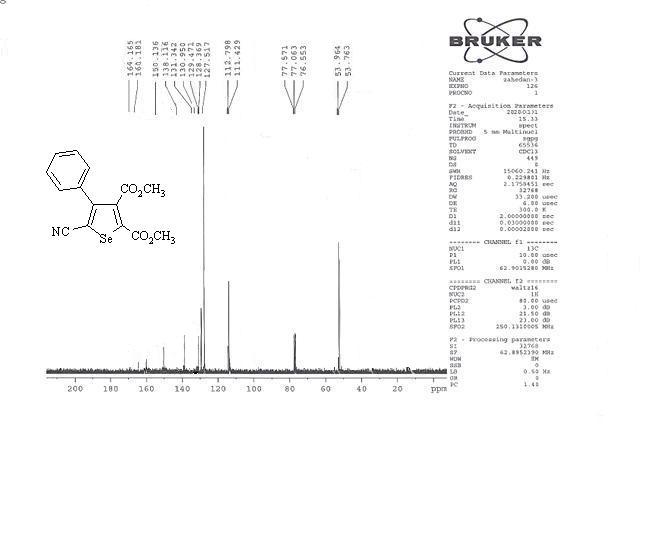


**Figure S 10:** 13C NMRspectrum of **3e**
